# Supplementary material
Source: HighWire-hosted journal article supplement (https://gut.bmj.com/content/72/1/216)
Supplement: inline-supplementary-material-1 [file inline-supplementary-material-1.pdf]

## Supplementary Figure 1

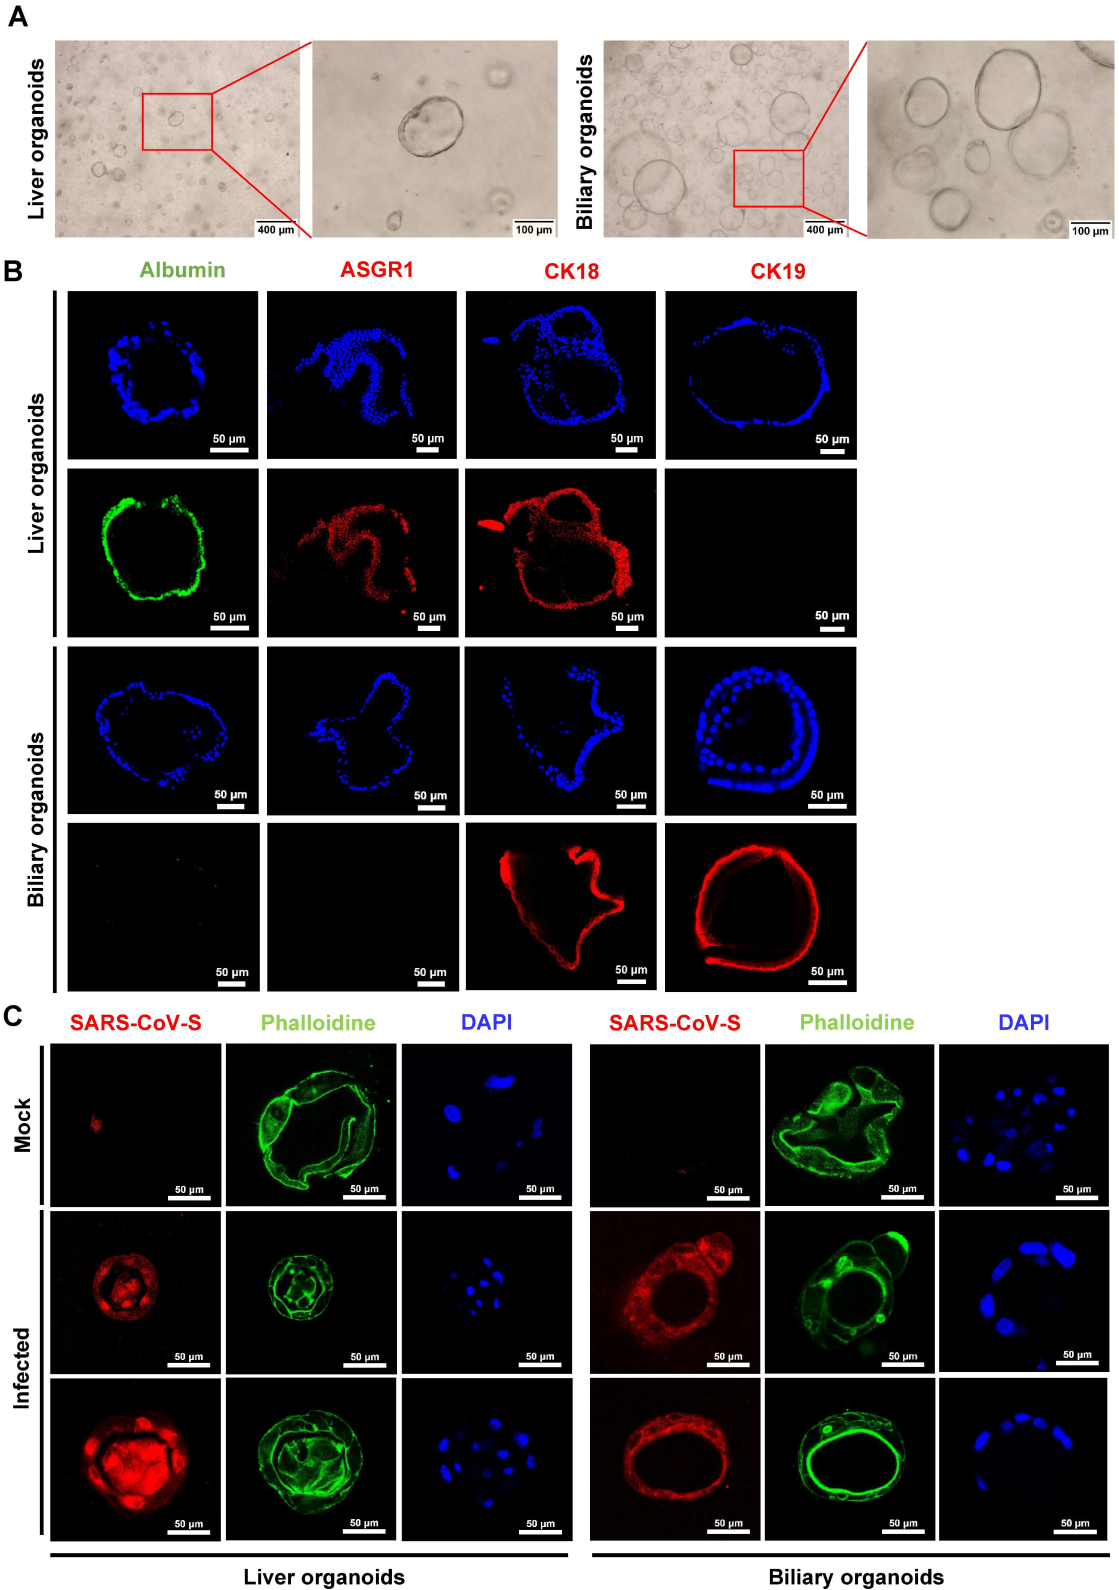

**Supplementary Figure 1 (A)** Representative bright field pictures of liver and biliary organoid. Note that, the liver and biliary organoids grew as a single-layered epithelium of ductal-like cells surrounding a central lumen. Scale bar, 100-400  $\mu\text{m}$ . **(B)** Differentiated liver and biliary organoids were immunostained using antibodies against human homologues to show Albumin (green), ASGR1 (red), CK18 (red) and CK19 (red) protein, respectively. Nuclei are stained with DAPI (blue). Scale bar, 50  $\mu\text{m}$ . **(C)** Immunofluorescent staining of SARS-CoV-2 infected liver organoids and biliary organoids. Virus are identified by SARS-CoV-2 spike (S) glycoprotein protein (red), Nuclei and actin filaments are stained with DAPI (blue) and Phalloidin (green), respectively. Scale bar, 50  $\mu\text{m}$ .
